# Supplementary material for: Application of 5-Methylcytosine DNA Glycosylase to the Quantitative Analysis of DNA Methylation
Source: PubMed Central journal article supplement (PMC7865733; doi:10.3390/ijms22031072), 2021-01-22
Supplement: ijms-22-01072-s001.pdf [file ijms-22-01072-s001.pdf]

## **Supplementary Information for**

Application of 5-methylcytosine DNA glycosylase to the quantitative analysis of DNA methylation

Woo Lee Choi, Young Geun Mok, and Jin Hoe Huh

Correspondence: Jin Hoe Huh

E-mail: [huhjh@snu.ac.kr](mailto:huhjh@snu.ac.kr)

**This PDF file includes:**

Supplementary Table S1

**Table S1.** List of primers for PCR amplification

| Primer                                                                 | Sequence (5'→3')                      | Region of interest                                                               |
|------------------------------------------------------------------------|---------------------------------------|----------------------------------------------------------------------------------|
| <b>DME-PCR of <i>Hpa</i> II-methylated yeast genomic DNA</b>           |                                       |                                                                                  |
| F1a                                                                    | TACTCATCTATGGCAATTCTGAGG              |                                                                                  |
| F1b                                                                    | GGACTACAGATTACAGGTCCTTC               | <i>Hpa</i> II site-methylated region                                             |
| R1                                                                     | CAGAAATATCATTTCAGTTTGACC              |                                                                                  |
| F2                                                                     | CAGCCAAAAAAGTCCTTATCACC               |                                                                                  |
| R2                                                                     | TCAGATGATCTATTTGAATCCTCTG             | <i>Hpa</i> II site-deficient region                                              |
| <b>DME-qPCR of methylated pUC19 plasmid</b>                            |                                       |                                                                                  |
| DG1764                                                                 | TAAGGGATTTTGGTCATGAGATTATC            |                                                                                  |
| DG1882                                                                 | GGTAACTGTCAGACCAAGTTTACTC             | CG site-deficient UMR                                                            |
| DG1883                                                                 | CACATTAATTGCGTTGCGCTCAC               |                                                                                  |
| DG1884                                                                 | GGATAACCGTATTACCGCCTTTGAG             | <i>M.Sss</i> I-methylated HMR                                                    |
| DG1915                                                                 | GATACGGGAGGGCTTACCATC                 |                                                                                  |
| DG1916                                                                 | ACTGGCGAACTACTTACTCTAGCTTC            | <i>Hpa</i> II-methylated LMR                                                     |
| <b>Bisulfite sequencing of <i>FWA</i> allele in <i>Arabidopsis</i></b> |                                       |                                                                                  |
| DG662                                                                  | TAAGAGAATTTAAATGYAAAYTTTGYAAATA       |                                                                                  |
| DG663                                                                  | CCTAACAATRCAATCTRTTTCRAAAATRAC        | Unmethylated gene <i>ASAI</i>                                                    |
| 5'- <i>FWA</i> F                                                       | GGTTYTATAYTAATATYAAAGAGTTATGGGYGGAAG  |                                                                                  |
| 5'- <i>FWA</i> R                                                       | CAAARTACTTTACACATAARCRAAAAACARACAAATC | 5'-regulatory region upstream from start codon of <i>FWA</i> gene [1]            |
| <b>DME-qPCR of <i>FWA</i> allele in <i>Arabidopsis</i></b>             |                                       |                                                                                  |
| DG1287                                                                 | GAACCCTTTTAAAGGACTAGCCCA              |                                                                                  |
| DG1288                                                                 | CGAAAATGACTGTTAAGAGCTCGTTG            | Unmethylated gene <i>ASAI</i>                                                    |
| DG1289                                                                 | CATACGAGCACCGCTTACGG                  |                                                                                  |
| DG1290                                                                 | GAACCAAATCATTCTCTAAACAAAGTGT          | 5'-regulatory region 0.7 kb upstream from the start codon of the <i>FWA</i> gene |
| <b>CAPS marker</b>                                                     |                                       |                                                                                  |
| DG660                                                                  | CCAGCCAAATATCAGATCTTGCGCC             |                                                                                  |
| DG661                                                                  | CCTTAAACAACCAAATAGCASTCCGACCAATG      | 5'-regulatory region from the start codon of the <i>FWA</i> gene                 |

(Continued)

| Primer                                                            | Sequence (5'→3')                        | Region of interest                                                                   |
|-------------------------------------------------------------------|-----------------------------------------|--------------------------------------------------------------------------------------|
| <b>Bisulfite sequencing of <i>Cnr</i> epiallele</b>               |                                         |                                                                                      |
| ATP1-1 F                                                          | TGAAYGAGATTYAAGYTGGGGAAATGGT            | Unmethylated gene <i>ATP 1</i> [2]                                                   |
| ATP1-1 R                                                          | CCCCCTTCCATCAATARRTACTCCCA              |                                                                                      |
| DG1680                                                            | TTYTAAGYTGYTAYAGAGATATTGGAAGAG          | <i>Cnr</i> epiallele 2.5 kb upstream from the start codon of the <i>CNR</i> gene [3] |
| DG1682                                                            | CARATTA AACACTTCATCAATTRAACAA           |                                                                                      |
| <b>DME-qPCR of <i>Cnr</i> epiallele</b>                           |                                         |                                                                                      |
| DG1801                                                            | GAATGAGAATGTAGGGATTGTTGTC               | Unmethylated gene <i>ATP 1</i>                                                       |
| DG1802                                                            | CCCTTCCATCAATAGGTACTCCC                 |                                                                                      |
| DG1803                                                            | CAACAGCTATCATTTATTATGTTACCTC            | <i>Cnr</i> epiallele 2.5 kb upstream from the start codon of the <i>CNR</i> gene     |
| DG1804                                                            | AAATCATGTAATATAGCTAGGCAGAGG             |                                                                                      |
| <b>RT-qPCR of <i>CNR</i></b>                                      |                                         |                                                                                      |
| CAC F                                                             | CCTCCGTTGTGATGTAAGTGG                   | SGN-U314153 ( <i>CAC</i> ) gene [4]                                                  |
| CAC R                                                             | ATTGGTGGAAAGTAACATCATCG                 |                                                                                      |
| TIP41 F                                                           | ATGGAGTTTTTGAGTCTTCTGC                  | SGN-U321250 ( <i>TIP41</i> ) gene [4]                                                |
| TIP41 R                                                           | GCTGCGTTTCTGGCTTAGG                     |                                                                                      |
| QRT-PCR forward primer                                            | TCCGGGAATTGACAGAAGATAGAGAG              | <i>CNR</i> gene [3]                                                                  |
| QRT-PCR reverse primer                                            | TTCTGTCAGCAATGTAGCAGATTCA               |                                                                                      |
| <b>Bisulfite sequencing of the DMR in the <i>CNR</i> promoter</b> |                                         |                                                                                      |
| DG2395                                                            | AGTGGAAGGAYAATTYTAAATTATTTYTGA          | Unmethylated gene <i>Actin</i> (Solyc01g066800)                                      |
| DG2396                                                            | CTAAATCCAACRAAATRCCTAARCCCTATAC         |                                                                                      |
| DG2364                                                            | GAGGAGTTGTGYAAYYATAGAYYAAAGYYAGTGG      | DMR 0.7 kb upstream from the start codon of the <i>CNR</i> gene [5]                  |
| DG2365                                                            | CACTCTACTRRACCRACATRRACA ACTRARARACCAAC |                                                                                      |
| <b>DME-qPCR of the DMR in the <i>CNR</i> promoter</b>             |                                         |                                                                                      |
| DG2397                                                            | CATTATAACTTGTTCAATCTTGAATCAAG           | Unmethylated gene <i>Actin</i> (Solyc01g066800)                                      |
| DG2398                                                            | TATACACGACCCCCTCCGATGTAC                |                                                                                      |
| DG2399                                                            | GTTTAGTCGACTCCCTTCGGAATC                | DMR 0.7 kb upstream from the start codon of the <i>CNR</i> gene                      |
| DG2401                                                            | CTCTTTTCTCTAGCTTTGGAGGGATC              |                                                                                      |

## References

1. Schoft, V.K.; Chumak, N.; Choi, Y.; Hannon, M.; Garcia-Aguilar, M.; Machlicova, A.; Slusarz, L.; Mosiolek, M.; Park, J.S.; Park, G.T.; et al. Function of the DEMETER DNA glycosylase in the *Arabidopsis thaliana* male gametophyte. *Proc. Natl. Acad. Sci. USA* **2011**, *108*, 8042–8047, doi:10.1073/pnas.1105117108.
2. Wang, J.; Wang, C.; Long, Y.; Hopkins, C.; Kurup, S.; Liu, K.; King, G.J.; Meng, J. Universal endogenous gene controls for bisulphite conversion in analysis of plant DNA methylation. *Plant Methods* **2011**, *7*, 39, doi:10.1186/1746-4811-7-39.
3. Manning, K.; Tor, M.; Poole, M.; Hong, Y.; Thompson, A.J.; King, G.J.; Giovannoni, J.J.; Seymour, G.B. A naturally occurring epigenetic mutation in a gene encoding an SBP-box transcription factor inhibits tomato fruit ripening. *Nat. Genet.* **2006**, *38*, 948–952, doi:10.1038/ng1841.
4. Exposito-Rodriguez, M.; Borges, A.A.; Borges-Perez, A.; Perez, J.A. Selection of internal control genes for quantitative real-time RT-PCR studies during tomato development process. *BMC Plant Biol.* **2008**, *8*, 131, doi:10.1186/1471-2229-8-131.
5. Zhong, S.; Fei, Z.; Chen, Y.R.; Zheng, Y.; Huang, M.; Vrebalov, J.; McQuinn, R.; Gapper, N.; Liu, B.; Xiang, J.; et al. Single-base resolution methylomes of tomato fruit development reveal epigenome modifications associated with ripening. *Nat. Biotechnol.* **2013**, *31*, 154–159, doi:10.1038/nbt.2462.
